# Supplementary material for: Transcriptomic Studies Reveal that the Rhizobium leguminosarum Serine/Threonine Protein Phosphatase PssZ has a Role in the Synthesis of Cell-Surface Components, Nutrient Utilization, and Other Cellular Processes
Source: MDPI journal article supplement (doi:10.3390/ijms20122905), 2019-06-14
Supplement: s1 [file s1]

Supplementary material

Table S2

A list of differentially expressed genes (DEGs) of the highest values ( $\log_2$  fold-change Rt24.2/Rt297  $\geq 5$  or  $\leq -5$ )

| Gene                                                 | Function                                                                 | Gene expression ( $\log_2$ fold change Rt24.2/Rt297) |
|------------------------------------------------------|--------------------------------------------------------------------------|------------------------------------------------------|
| <b>Carbohydrate transport and metabolism (COG G)</b> |                                                                          |                                                      |
| Rt651_4                                              | L-xylulose kinase                                                        | -9.02                                                |
| Rt651_5                                              | aldolase                                                                 | -7.81                                                |
| Rt651_6                                              | glycerol-3-phosphate dehydrogenase                                       | -7.23                                                |
| Rt651_7                                              | aldo/keto reductase                                                      | -9.58                                                |
| Rt651_9                                              | ABC transporter permease                                                 | -7.36                                                |
| Rt651_10                                             | D-ribose transporter ATP-binding protein                                 | -8.36                                                |
| Rt651_11                                             | ABC transporter                                                          | -10.50                                               |
| Rt651_20                                             | major facilitator transporter                                            | -10.70                                               |
| Rt651_22                                             | pyridoxamine 5-prime-phosphate                                           | -10.36                                               |
| Rt651_41                                             | 4-alpha-glucanotransferase                                               | -9.39                                                |
| Rt659_5                                              | ribokinase                                                               | -10.12                                               |
| Rt659_7                                              | ribose ABC transporter permease                                          | -8.49                                                |
| Rt659_8                                              | ribose ABC transporter                                                   | -8.19                                                |
| Rt659_9                                              | RbsB                                                                     | -9.19                                                |
| Rt659_11                                             | ribokinase                                                               | -9.33                                                |
| Rt659_12                                             | fucose binding protein                                                   | -8.85                                                |
| Rt659_13                                             | sugar ABC transporter permease                                           | -9.97                                                |
| Rt659_14                                             | sugar ABC transporter permease                                           | -10.16                                               |
| Rt659_15                                             | sugar ABC transporter substrate-binding protein                          | -11.12                                               |
| Rt659_16                                             | sugar ABC transporter ATP-binding protein                                | -8.79                                                |
| Rt659_17                                             | fucose binding protein                                                   | -12.13                                               |
| Rt679_5                                              | glycosyl transferase                                                     | 12.27                                                |
| <b>Amino acid transport and metabolism (E)</b>       |                                                                          |                                                      |
| Rt651_21                                             | divalent metal transporter permease                                      | -12.03                                               |
| Rt651_29                                             | D-amino acid oxidase                                                     | -9.26                                                |
| Rt651_30                                             | amino acid ABC transporter ATP-binding protein                           | -8.84                                                |
| Rt651_31                                             | amino acid ABC transporter substrate-binding protein                     | -9.11                                                |
| Rt659_2                                              | cytochrome C550                                                          | -7.37                                                |
| Rt659_3                                              | peptide ABC transporter ATP-binding protein                              | -8.04                                                |
| Rt659_4                                              | ABC transporter                                                          | -8.93                                                |
| Rt659_20                                             | glycine/betaine ABC transporter                                          | -11.02                                               |
| Rt659_21                                             | glycine/betaine ABC transporter                                          | -10.69                                               |
| Rt659_22                                             | glycine/betaine ABC transporter permease                                 | -10.42                                               |
| Rt659_24                                             | ornithine cyclodeaminase                                                 | -12.13                                               |
| Rt659_26                                             | histidine ammonia-lyase                                                  | -10.72                                               |
| Rt772_15                                             | acyl-CoA thioesterase                                                    | 10.98                                                |
| Rt782_61                                             | cytochrome C4                                                            | 6.02                                                 |
| Rt782_62                                             | glutamine ABC transporter ATP-binding protein                            | 6.42                                                 |
| Rt782_63                                             | ABC transporter permease                                                 | 7.00                                                 |
| Rt782_64                                             | ABC transporter substrate-binding protein                                | 6.11                                                 |
| <b>Lipid transport and metabolism (I)</b>            |                                                                          |                                                      |
| Rt621_23                                             | S-adenosylmethionine: diacylglycerol 3-amino-3-carboxypropyl transferase | 5.09                                                 |
| Rt651_3                                              | choline dehydrogenase                                                    | -9.64                                                |
| Rt651_17                                             | monooxygenase                                                            | -11.67                                               |
| Rt651_24                                             | phospholipase D                                                          | -10.64                                               |
| Rt659_28                                             | dehydratase                                                              | -10.52                                               |
| Rt659_29                                             | oxidoreductase                                                           | -9.79                                                |
| Rt659_30                                             | CoA transferase                                                          | -11.20                                               |

|                                                                          |                                                      |        |
|--------------------------------------------------------------------------|------------------------------------------------------|--------|
| <b>Inorganic ion transport and metabolism (P)</b>                        |                                                      |        |
| Rt659_2                                                                  | cytochrome C550                                      | -7.37  |
| Rt659_3                                                                  | peptide ABC transporter ATP-binding protein          | -8.04  |
| Rt659_4                                                                  | ABC transporter                                      | -8.93  |
| Rt659_23                                                                 | phosphate ABC transporter substrate-binding protein  | -9.98  |
| <b>Secondary metabolites biosynthesis, transport, and catabolism (Q)</b> |                                                      |        |
| Rt634_68                                                                 | phasin                                               | -6.09  |
| Rt651_14                                                                 | 6-chlorohydroxyquinol-1,2-dioxygenase                | -7.24  |
| <b>Energy production and conversion (C)</b>                              |                                                      |        |
| Rt651_15                                                                 | maleylacetate reductase                              | -8.69  |
| Rt651_18                                                                 | 4-hydroxyphenylacetate 3-monooxygenase               | -7.51  |
| <b>Coenzyme transport and metabolism (H)</b>                             |                                                      |        |
| Rt621_24                                                                 | methyltransferase                                    | 5.08   |
| Rt688_8                                                                  | 3-demethylubiquinone-9 3-methyltransferase           | 11.07  |
| Rt759_1                                                                  | 3-phosphoglycerate dehydrogenase                     | 5.96   |
| <b>Translation, ribosomal structure and biogenesis (J)</b>               |                                                      |        |
| Rt724_2                                                                  | 30S ribosomal protein S21                            | -8.19  |
| <b>Transcription (K)</b>                                                 |                                                      |        |
| Rt651_2                                                                  | cold-shock protein                                   | -12.65 |
| Rt651_8                                                                  | Crp/Fnr family transcriptional regulator             | -9.87  |
| Rt651_32                                                                 | LacI family transcriptional regulator                | -11.03 |
| Rt651_33                                                                 | LuxR family transcriptional regulator                | -12.65 |
| Rt659_6                                                                  | RpiR family transcriptional regulator                | -10.71 |
| Rt659_27                                                                 | histidine utilization repressor                      | -10.65 |
| Rt659_32                                                                 | LysR family transcriptional regulator                | -10.87 |
| Rt688_7                                                                  | Cro/CI family transcriptional regulator              | 12.66  |
| Rt713_1                                                                  | LysR family transcriptional regulator                | 5.78   |
| Rt770_14                                                                 | TetR family transcriptional regulator                | -5.13  |
| <b>Cell wall/membrane/envelope biogenesis (M)</b>                        |                                                      |        |
| Rt659_10                                                                 | xylanase                                             | -9.37  |
| Rt659_25                                                                 | ABC transporter                                      | -12.62 |
| Rt679_1                                                                  | glycosyl transferase family A                        | 12.19  |
| Rt679_3                                                                  | glycosyl transferase                                 | 10.95  |
| Rt679_4                                                                  | glycosyl transferase                                 | 12.92  |
| Rt679_6                                                                  | UDP-glucose 4-epimerase                              | 12.70  |
| Rt772_1                                                                  | exopolysaccharide biosynthesis protein               | 9.79   |
| Rt772_2                                                                  | membrane protein                                     | 9.57   |
| Rt772_3                                                                  | 1,4-beta-xylanase                                    | 13.33  |
| Rt772_4                                                                  | glycosyl transferase                                 | 15.10  |
| Rt772_5                                                                  | acetyltransferase                                    | 11.96  |
| Rt772_6                                                                  | ketal pyruvate transferase                           | 12.48  |
| Rt772_7                                                                  | exopolysaccharide biosynthesis protein               | 14.42  |
| Rt772_8                                                                  | exopolysaccharide biosynthesis protein               | 13.89  |
| Rt772_9                                                                  | galactosyl transferase                               | 13.09  |
| Rt772_10                                                                 | glycosyl transferase                                 | 13.07  |
| Rt772_11                                                                 | glycosyl transferase                                 | 13.23  |
| Rt772_12                                                                 | glycosyl transferase family A                        | 12.07  |
| Rt772_13                                                                 | glucuronosyl transferase                             | 12.95  |
| Rt772_14                                                                 | glucuronosyl transferase                             | 12.59  |
| Rt772_15                                                                 | hypotetical protein (Orf3)                           | 10.980 |
| Rt772_16                                                                 | hemolysin secretion protein D                        | 13.217 |
| Rt772_17                                                                 | type I secretion protein                             | 14.073 |
| Rt772_18                                                                 | polysaccharidase                                     | 13.23  |
| Rt772_19                                                                 | autoaggregation protein                              | 13.22  |
| <b>Signal transduction mechanisms (T)</b>                                |                                                      |        |
| Rt651_28                                                                 | chemotaxis protein                                   | -9.59  |
| Rt651_31                                                                 | amino acid ABC transporter substrate-binding protein | -9.11  |

|                                             |                                           |       |
|---------------------------------------------|-------------------------------------------|-------|
| Rt688_6                                     | peptide antibiotic resistance protein     | 11.79 |
| Rt679_8                                     | adenylate cyclase                         | 12.28 |
| Rt782_64                                    | ABC transporter substrate-binding protein | 6.11  |
| <b>Cell motility (N)</b>                    |                                           |       |
| Rt651_28                                    | chemotaxis protein                        | -9.59 |
| Rt748_1                                     | flagella associated protein               | 5.87  |
| <b>Defense mechanisms (V)</b>               |                                           |       |
| Rt679_2                                     | ABC transporter ATP-binding protein       | 11.76 |
| Rt688_3                                     | antibiotic resistance protein             | 7.05  |
| Rt716_2                                     | beta-lactamase                            | -5.61 |
| Rt731_2                                     | hemolysin D                               | 6.63  |
| <b>General function prediction only (R)</b> |                                           |       |
| Rt651_16                                    | amidohydrolase                            | -9.22 |
| Rt659_29                                    | oxidoreductase                            | -9.79 |
| Rt704_2                                     | hypothetical protein                      | -6.03 |
| Rt759_1                                     | 3-phosphoglycerate dehydrogenase          | 5.96  |
| <b>Function unknown (S)</b>                 |                                           |       |
| Rt651_25                                    | membrane protein                          | -8.19 |
| Rt659_31                                    | membrane protein                          | -9.07 |
| <b>Mobilome (X)</b>                         |                                           |       |
| Rt706_3                                     | plasmid stabilization protein             | 6.54  |
| Rt734_2                                     | transposase                               | 6.27  |
